# Supplementary material
Source: PubMed Central journal article supplement (PMC6384073)
Supplement: JVI.01978-18-s0001.pdf [file JVI.01978-18-s0001.pdf]

## **List of Supplemental Tables**

### **Table S1**

The table contains all genome-wide expression data (Human gene level RPKM values) presented in this study, which were generated by RNA-seq.

### **Table S2**

The table contains all genome-wide expression data (Human transcript level RPKM values) presented in this study, which were generated by RNA-seq.

### **Table S3**

The table is related to Figure 2B and contains the gene level expression values (RPKM) and additional information for the 3123 differentially expressed human genes.

### **Table S4**

The table is related to Figure 2C and provides gene ontology information for the up- and down-regulated human genes.

### **Table S5**

The table provides a list and additional information of the identified 11,469 FLAG-RTA ChIP-seq peaks on the human genome.

### **Table S6**

The table is related to Figure 3A and contains the gene level expression values (RPKM) and additional information for the 163 core RIGs.
